# Supplementary material for: Direct observation of morphological evolution of a catalyst during carbon nanotube forest growth: new insights into growth and growth termination
Source: Royal Society of Chemistry journal article supplement (doi:10.1039/c5nr05547d), 2015-12-15
Supplement: c5nr05547d1.pdf [file c5nr05547d1.pdf]

## Supplementary Information

### Direct Observation on Morphological Evolution of Catalyst during Carbon Nanotube Forest Growth: New Insights for Growth and Growth Termination

*Seojeong Jeong,<sup>1,2,§</sup> Jaegeun Lee,<sup>1,§</sup> Hwan-Chul Kim,<sup>2</sup> Jun Yeon Hwang<sup>1</sup>, Bon-Cheol Ku<sup>1</sup>, Dmitri  
N. Zakharov,<sup>3</sup> Benji Maruyama,<sup>4</sup> Eric A. Stach,<sup>3</sup> and Seung Min Kim,<sup>1,\*</sup>*

<sup>1</sup> Institute of Advanced Composite Materials, Korea Institute of Science and Technology,  
Jeonbuk 565-905, Republic of Korea

<sup>2</sup> Department of Organic Materials and Fiber Engineering, Chonbuk National University,  
Jeonbuk 561-756, Republic of Korea

<sup>3</sup> Center for Functional Nanomaterials, Brookhaven National Laboratory, Upton, NY 11733 USA

<sup>4</sup> Materials and Manufacturing Directorate, Air Force Research Laboratory, Wright-Patterson Air  
Force Base, OH 45433

§ These authors contributed equally.

\*Corresponding author: [seungmin.kim@kist.re.kr](mailto:seungmin.kim@kist.re.kr)

## 1. Additional TEM images of CNTs and catalyst particles

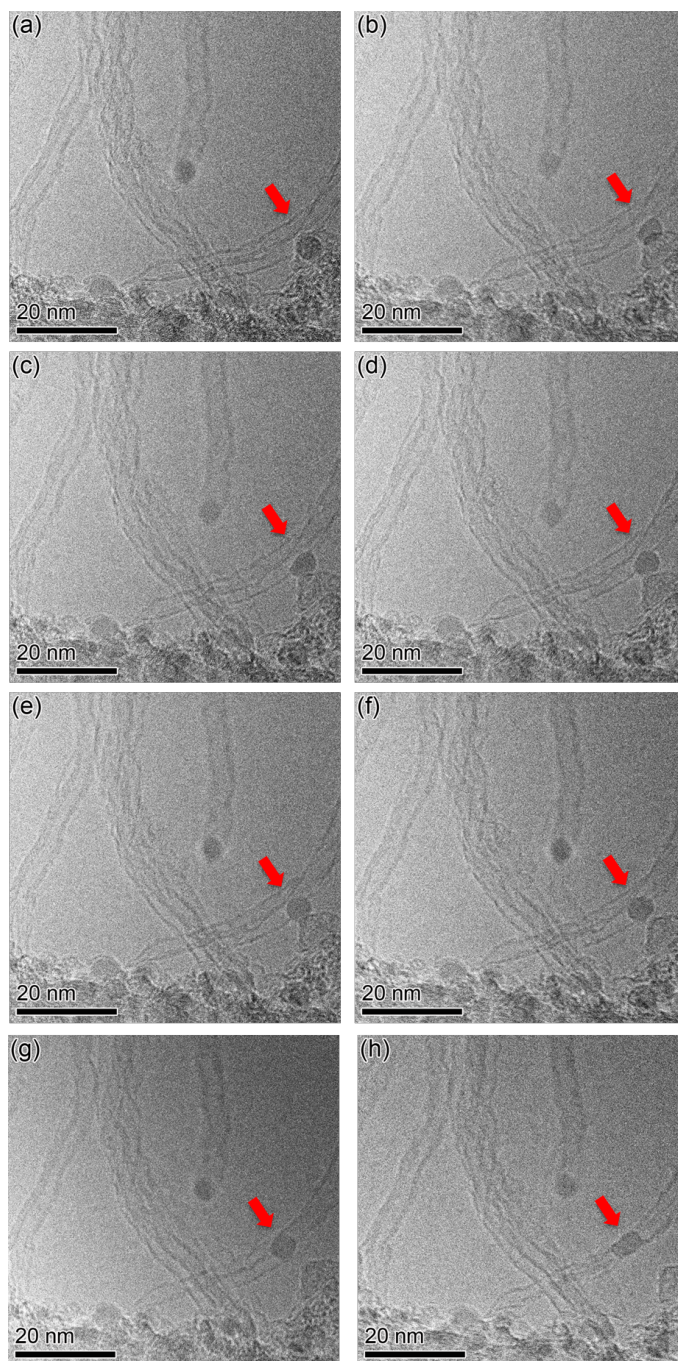

Fig. S1. Eight subsequent snapshots (a)-(h) captured from the video recorded during in-situ TEM growth experiment showing that a catalyst particle jump to an adjacent CNT.

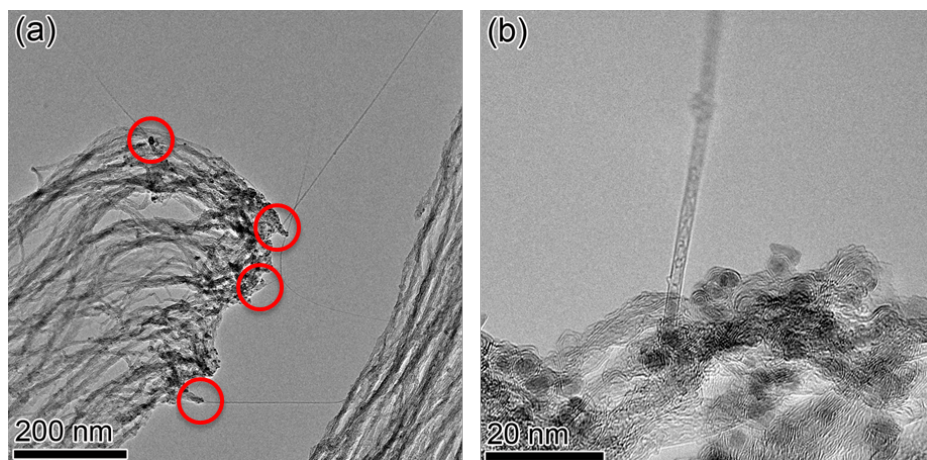

Fig. S2. (a) High resolution TEM images of the lifted catalysts that nucleated and grew new CNTs of their own and (b) magnified TEM image of (a).

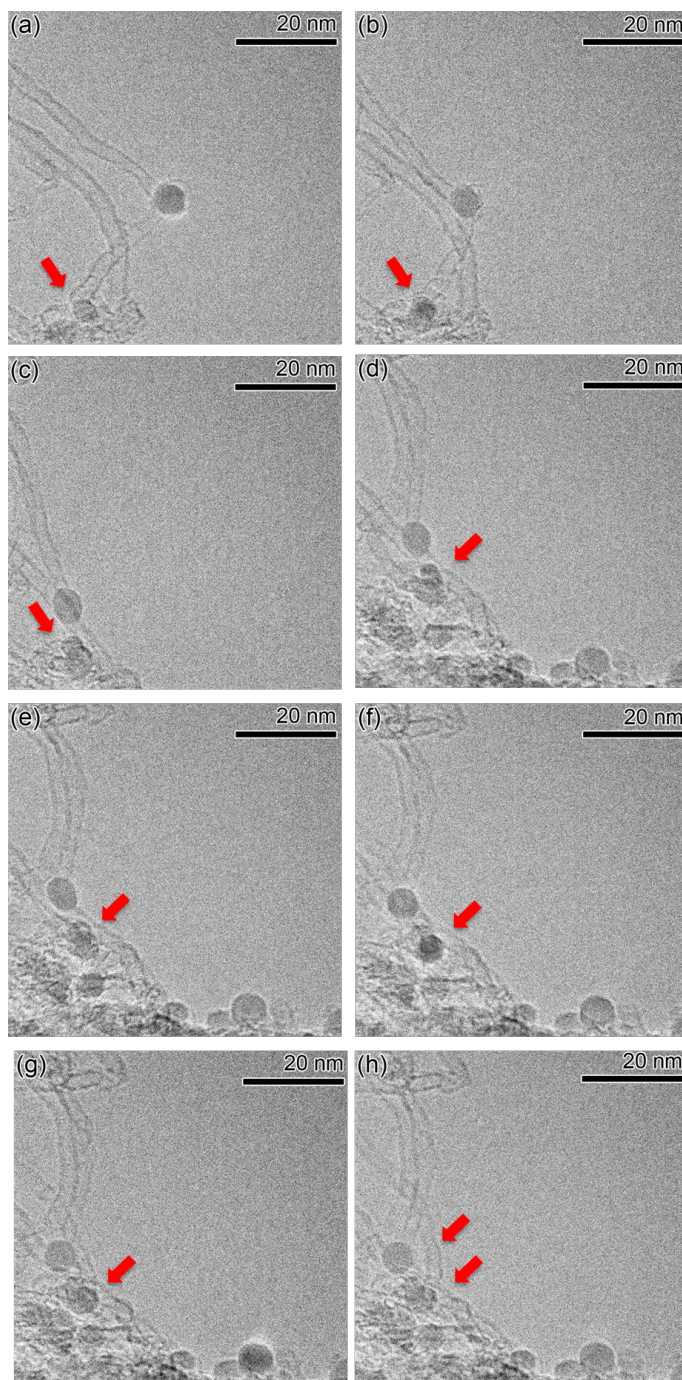

Fig. S3. Eight subsequent snapshots (a)-(h) captured from the video recorded during in-situ TEM growth experiment showing that a lifted catalyst particle produce a new CNT.
